# Supplementary material for: The sero-prevalence of brucellosis in cattle and their herders in Bahr el Ghazal region, South Sudan
Source: PLOS journal article supplement (doi:10.1371/journal.pntd.0006456), 2018-06-20

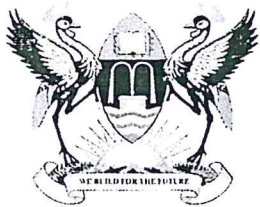

# MAKERERE UNIVERSITY

COLLEGE OF VETERINARY MEDICINE,  
ANIMAL RESOURCES & BIOSECURITY

OFFICE OF THE DEAN

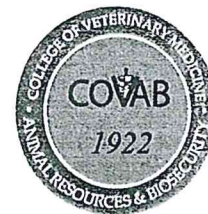

SAFER PLANET. PROSPEROUS COMMUNITIES

SCHOOL OF BIOSECURITY, BIOTECHNICAL AND LABORATORY SCIENCES (SBS)

P.O. Box 7062 Kampala, Uganda  
Tel: +256-414-554685  
Fax: +256-414-554685

Cables : "MAKUNIKA"  
Email : sbs@vetmed.mak.ac.ug  
Website : www.covab.mak.ac.ug

Your Ref:

Our Ref: **SBS.NA.2015**

Date: **14/12/2015**

## RESEARCH AND ETHICS COMMITTEE REVIEW AND ENDORSEMENT

### Statement from the Institutional Ethical Review Board:

The REC only accepts for review and approval, research proposals that have been found both scientifically and ethically acceptable in accordance with guidelines on Institutional Ethical Review Boards.

We the **Institutional Ethical Review Committee** established by  
**COLLEGE OF VETERINARY MEDICINE, ANIMAL RESOURCES AND BIOSECURITY**  
do certify that we have reviewed the research proposal (**SBS/REC/15/133**) entitled;  
***Brucellosis at Human-Domestic Animal Interface in Greater Bahr Elghazal States, South Sudan***  
submitted by

**Dr. Nuol Aywel Madut Yajj**, Makerere University

We attest to scientific and ethical merit of this study and competency of the investigator(s) to conduct the research and hereby recommend the proposal to the Uganda National Council for Science and Technology (UNCST) for approval

### SIGNATURES

|                                        | Name                         | Signature | Date       |
|----------------------------------------|------------------------------|-----------|------------|
| <b>Ethics Committee Representative</b> | Assoc. Prof. Clovice Kankya  |           | 14/12/2015 |
| <b>Head of Ethics Committee</b>        | Assoc. Prof. Frank N. Mwiine |           | 14/12/2015 |

### CONTACTS

Tel: +256 787 495 220  
E-mail: [mwiine@covab.mak.ac.ug](mailto:mwiine@covab.mak.ac.ug)  
[fmwiine@gmail.com](mailto:fmwiine@gmail.com)

### OFFICIAL STAMP OF INSTITUTION

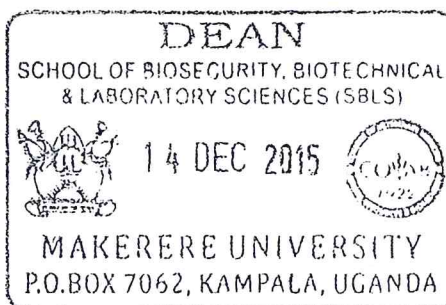

Supplement: S1 (10.1371/journal.pntd.0006456.s001) [file journal.pntd.0006456.s001]
